# Supplementary material
Source: publisher site journal article supplement (https://www.dovepress.com/article/436350)
Supplement: Supplementary file 1 [file get_supplementary_file.php]

# ApoSEVs-Mediated Modulation of Versatile Target Cells Promotes Diabetic Wound Healing: Unveiling a Promising Strategy

Yang Jian1*, Zhang Xuanhao1,2*, Wang Guanyu1,2, Ma Shixing1,2, Yu Yejia1, Liao Chengcheng1, Wang Zhuo1,2, Liang Cheng1, Li Maojiao1,2, Tian Weidong1,2#, Liao Li1,2#

1State Key Laboratory of Oral Diseases &National Clinical Research Center for Oral Diseases & Engineering Research Center of Oral Translational Medicine, Ministry of Education & National Engineering Laboratory for Oral Regenerative Medicine, West China Hospital of Stomatology, Sichuan University, Chengdu, 610041, People’s Republic of China

2 Department of Oral and Maxillofacial Surgery, West China Hospital of Stomatology, Sichuan University, Chengdu, 610041, People’s Republic of China

* Co-first author: Jian Yang and Xuanhao Zhang contributed equally to this work.

# Correspondence to: lliao@scu.edu.cn (Li Liao), drtwd@sina.com (Weidong Tian)

Corresponding author:
Name: Prof. Li Liao
Institution and address: State Key Laboratory of Oral Disease, West China School of Stomatology, Sichuan University, No.14, 3Rd Section Of Ren Min Nan Rd. Chengdu, Sichuan 610041, China.
Telephone: +86-28-85503499
E-mail: [lliao@scu.edu.cn](mailto:lliao@scu.edu.cn)
Or
Name: Prof. Weidong Tian
Institution and address: State Key Laboratory of Oral Disease, West China School of Stomatology, Sichuan University, No.14, 3Rd Section Of Ren Min Nan Rd. Chengdu, Sichuan 610041, China.
Telephone: +86-28-85501256
E-mail: [drtwd@sina.com](mailto:drtwd@sina.com)

# Supplementary Information

**Figure S1.** Characterization of human ADSCs. (A) Flow cytometric analysis of the surface markers showed positive expression of CD90, CD44, and CD105, and negative expression of hematopoietic markers CD34, CD11b, and CD45. (B) Representative image of colony formation of murine ADSCs. (C) Representative image of Alizarin red staining and Oil Red O staining of human ADSCs.

**Figure S2.** The morphological changes of RAW264.7 cells before and after LPS treatment. (A) The morphology of RAW264.7 cells was changed when treated with 100ng/mL LPS. Scale bar = 100 μm.
